1 ***Streptococcus equi* subsp. *zooepidemicus* associated with sudden death of swine in North**  
2 **America**

3

4 **Running Title:** *Streptococcus equi* subsp *zooepidemicus* in pigs

5 **Keywords:** *Streptococcus zooepidemicus*, sudden death, pigs, lymphnode, mortality,

6 *zooepidemicus*, outbreak, north America, pneumonia.

7

8 **Authors:** Matheus de O. Costa<sup>1,2</sup>, Brad Lage<sup>3</sup>.

9 **Affiliations:**

10 <sup>1</sup>University of Minnesota, Department of Veterinary Population Medicine, Saint Paul, MN. USA.  
11 (M. O. Costa).

12 <sup>2</sup>University of Saskatchewan, Large Animal Clinical Sciences. Saskatoon, SK. Canada. (M.O.  
13 Costa)

14 <sup>3</sup>Maple Leaf Agri-Farms, Landmark Manitoba, Canada. (B. Lage).

15

16

17

18

19

20

21 **Abstract—50 words**

22 Historically described as a commensal of the swine upper-respiratory tract, *Streptococcus*  
23 *equi* subsp. *zooepidemicus* was only reported previously in Asia as an important swine pathogen.  
24 Here we report the isolation and whole genome characterization of *Streptococcus equi* subsp.  
25 *zooepidemicus* associated with a sudden death outbreak in pigs in North America.

26 **Text—764 words**

27 *Streptococcus equi* subsp. *zooepidemicus* (*S. zooepidemicus*) is considered a commensal  
28 and opportunistic pathogen of several warm-blooded hosts, including humans, horses, different  
29 canines and swine. It is a Gram-positive,  $\beta$ -hemolytic coccus belonging to the Lancefield group  
30 C. It can cause severe disease characterized by pneumonia, septicemia and meningitis (1, 2). *S.*  
31 *zooepidemicus* has been suggested as a normal inhabitant of the palatine tonsils of pigs, being  
32 detected by both culture and high-throughput sequencing in samples collected from healthy  
33 animals (3). However, strains virulent to pigs have also been reported in the literature,  
34 particularly associated with high-mortality outbreaks of sudden death and respiratory disease in  
35 China (4). Currently, there are no vaccines available for this pathogen and control and prevention  
36 methods are hardly applied, given its commensal nature in swine. Here, we report an outbreak of  
37 sudden death associated with *S. zooepidemicus* in pigs housed in intensive rearing, commercial  
38 facilities in North America.

39 In April 2019 an outbreak of sudden death and abortions occurred in 4 loose-housed,  
40 commercial sow farms (approximately 9000 sows) in a large vertically integrated swine system  
41 within the province of Manitoba. This outbreak increased the cumulative mortality in the 3

42 affected sows herds by more than 1000 sows in the following 12 weeks. The abortion rate during  
43 this time period was approximately 11 x the normal rate. Animals were often described as  
44 apparently healthy during morning checks. Over the course of hours, sows would become  
45 unwilling to stand, develop fever, lethargy and die with no other apparent clinical signs. Other  
46 sows would abort and then go on to develop similar symptoms. Stressing factors in these farms,  
47 such as mixing of animals and the presence of other sick animals appeared to exacerbate  
48 outbreaks within pens. Animals were fed a commercial grade, nutritionally balanced diet as per  
49 ESF (electronic sow feeding) and had access to water *ad libitum*. Gross *post-mortem*  
50 examination of multiple animals, either euthanized or recently deceased, revealed the following  
51 common observations: rhinitis (mucopurulent discharge, mild, diffuse), pulmonary edema, gall  
52 bladder edema, hemorrhagic lymphadenopathy (tan to haemorrhagic) consisting of  
53 submandibular, cervical neck and bronchial lymph nodes, which taken together are suggestive of  
54 sepsis. All animals tested negative for PRRSV, *Mycoplasma hyopneumoniae*, SIV-A, PCV-3 and  
55 PCV-2 by real-time PCR. In parallel, Gram positive cocci were observed in imprints from heart  
56 and submandibular lymph nodes. Aerobic bacterial culture followed by Matrix-Assisted Laser  
57 Desorption/Ionization-Time Of Flight (MALDI-TOF) for identification of isolates revealed  
58 varying levels of *S. zooepidemicus* in liver, kidney, heart, brain, lung, spleen, and submandibular  
59 lymphnodes. Isolate identification was confirmed by two different veterinary diagnostic  
60 laboratories. Isolates (n=7, SAMN13058951, SAMN13058952, SAMN13058953,  
61 SAMN13058954, SAMN13058955, SAMN13058956, SAMN13058957) were found resistant to  
62 lincomycin, neomycin and tetracycline and susceptible to ampicillin, ceftiofur, penicillin and  
63 tilmicosin in a Kirby-Bauer disk diffusion assay.

64 DNA extraction was performed from isolates (DNeasy Powersoil Pro kit, Qiagen),  
65 quantified by Nanodrop (3300) and PicoGreen (Quant-iT dsDNA) and processed for sequencing  
66 (Illumina Nextera XT library prep kit). Sequencing was performed using MiSeq Nano V2 (2x250  
67 paired-end). Samples yield an average of 149,017 high quality reads, suggesting 50x coverage  
68 (genome size averaged 2.1 mbp). Genome assembly, annotation and downstream analyses were  
69 conducted using the PATRIC package (5). Genomes averaged 2.1 million bp in size, and 41.34%  
70 in GC content. All isolates were similar to previously published *S. zooepidemicus* genomes  
71 (Figure 1), demonstrating a whole-genome average nucleotide identity (ANIScore) of 99.7% to  
72 strain *S. zooepidemicus* ATCC35246. This particular strain was reported as isolated from a  
73 septicaemic pig during an outbreak that killed over 300,000 pigs in Sichuan province, China, in  
74 1976 (6). Interestingly, all isolates had an average ANIScore of 97.3%, when compared to *S.*  
75 *zooepidemicus* strain 4047, an isolate considered virulent, obtained from a horse diagnosed with  
76 strangles in the United Kingdom (7). In addition, all isolates obtained from pigs, regardless of  
77 what outbreak, were profiled as MLST (multi-locus sequence type) ST-194, including strain  
78 ATCC35246. Antimicrobial resistance genes identified in isolates from this outbreak included  
79 *gidB*, *SI2p* (streptomycin), *rpoB* (rifampin), *SI0p* (tetracycline), *kasA* (triclosan), *PgsA*, *LiaR*,  
80 *LiaS* (daptomycin), *folA*, *Dft* (trimethoprim), *folP* (sulfadiazine) and *FabK* (triclosan). Virulence  
81 factors found included the previously described *szm*, *lmb*, *fbpZ*, *skc*, *has* operon and *mag*  
82 regulon, which help explain the highly-virulent lifestyle of these isolates.

83 Taken together, these findings suggest the emergence of *S. zooepidemicus* ST-194 as a  
84 cause of mortality in pigs in North America. This specific sequence type seem to be particularly  
85 virulent to pigs, for reasons that remain unexplained. Given the clinical presentation described

86 here, this pathogen requires special attention and should no longer be overlooked, due to its  
87 historically accepted commensal lifestyle, when conducting diagnostic investigations.

## 88 **Acknowledgments**

89 The authors would like to acknowledge the Manitoba Veterinary Diagnostic Services for  
90 assistance.

91 **Author Bio** (first author only, unless there are only 2 authors)

92 Dr. Costa is an Assistant Professor at the University of Minnesota, USA. His research  
93 interests include swine bacterial pathogens to which no preventive or control methods are  
94 available besides antibiotics. Dr. Lage is the head Veterinarian at Maple Leaf Agri-Farms, the  
95 swine division for Maple Leaf Foods based in Landmark, Manitoba.

## 96 **References**

- 97 1. Pelkonen S, Lindahl SB, Suomala P, Karhukorpi J, Vuorinen S, Koivula I, et al.  
98 Transmission of *Streptococcus equi* subspecies *zooepidemicus* infection from horses to humans.  
99 Emerg Infect Dis. 2013;19(7):1041-8. Epub 2013/06/20. doi: 10.3201/eid1907.121365. PubMed  
100 PMID: 23777752; PubMed Central PMCID: PMC3713971.
- 101 2. FitzGerald W, Crowe B, Brennan P, Cassidy JP, Leahy M, McElroy MC, et al. Acute  
102 fatal haemorrhagic pneumonia caused by *Streptococcus equi zooepidemicus* in greyhounds in  
103 Ireland with subsequent typing of the isolates. Vet Rec. 2017;181(5):119. Epub 2017/06/11. doi:  
104 10.1136/vr.104275. PubMed PMID: 28600445.
- 105 3. Kernaghan S, Bujold AR, MacInnes JJ. The microbiome of the soft palate of swine. Anim  
106 Health Res Rev. 2012;13(1):110-20. Epub 2012/08/03. doi: 10.1017/S1466252312000102.  
107 PubMed PMID: 22853946.
- 108 4. Feng Z, Hu J. Outbreak of swine streptococcosis in Sichan province and identification of  
109 pathogen. Anim Husbandry Vet Med Lett. 1977;2:7-12.
- 110 5. Wattam AR, Davis JJ, Assaf R, Boisvert S, Brettin T, Bun C, et al. Improvements to  
111 PATRIC, the all-bacterial Bioinformatics Database and Analysis Resource Center. Nucleic Acids  
112 Res. 2017;45(D1):D535-D42. Epub 2016/12/03. doi: 10.1093/nar/gkw1017. PubMed PMID:  
113 27899627; PubMed Central PMCID: PMC3713971.
- 114 6. Waller AS, Robinson C. *Streptococcus zooepidemicus* and *Streptococcus equi* evolution:  
115 the role of CRISPRs. Biochem Soc Trans. 2013;41(6):1437-43. Epub 2013/11/22. doi:  
116 10.1042/BST20130165. PubMed PMID: 24256234.

117 7. Kelly C, Bugg M, Robinson C, Mitchell Z, Davis-Poynter N, Newton JR, et al. Sequence  
118 variation of the SeM gene of *Streptococcus equi* allows discrimination of the source of strangles  
119 outbreaks. J Clin Microbiol. 2006;44(2):480-6. Epub 2006/02/04. doi: 10.1128/JCM.44.2.480-  
120 486.2006. PubMed PMID: 16455902; PubMed Central PMCID: PMCPMC1392674.

121

122 **Figure 1.** Phylogenetic tree (all-shared proteins) of *Streptococcus equi* subsp. *zooepidemicus*  
123 whole-genome sequences obtained from the reported outbreak in pigs from North America (blue  
124 blocks, PRJNA578379), compared with previously published human, dog, horse and pig (green  
125 blocks) sequences from GenBank (n=58). Tree inferred using BLAST followed by FastTree  
126 within the PATRIC package(5). Support values shown indicate the number of times a particular  
127 branch was observed in the support trees using gene-wise jackknifing.



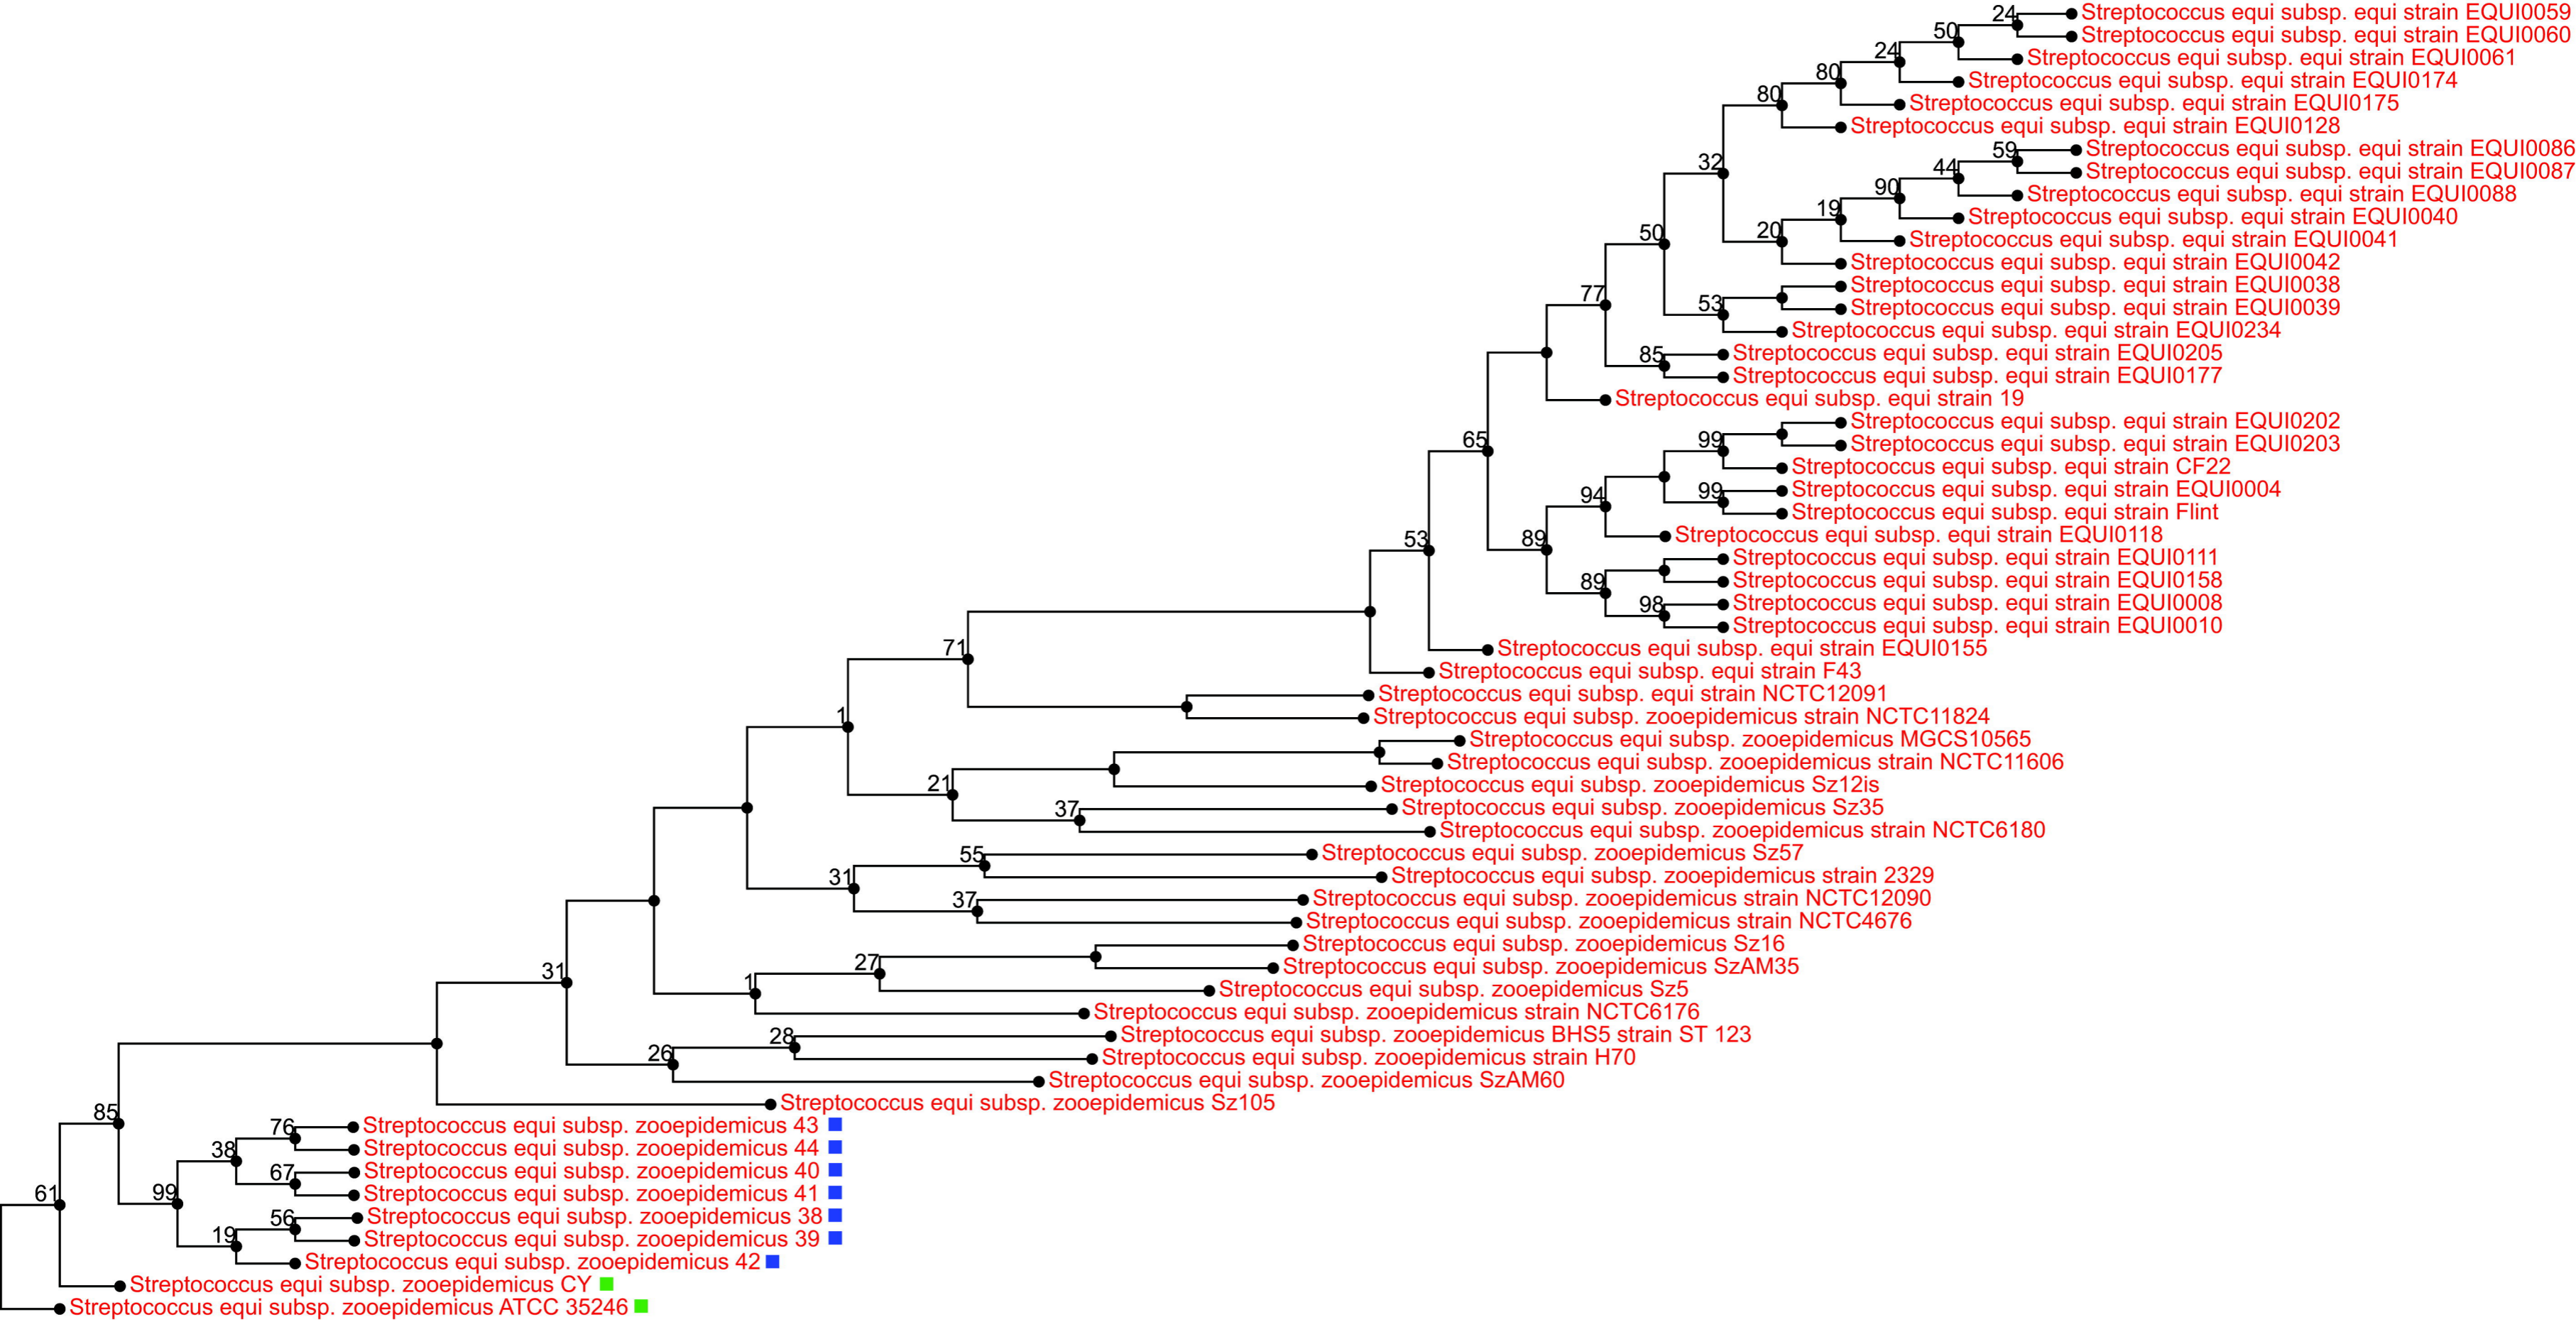

Source: https://www.biorxiv.org/content/10.1101/812636v2.full.pdf
